# Supplementary material for: ¡Dejadme hacer mientras tanto lo que quiera!: tarjeta de relés con expansión de puertos para ATM18
Source: MDPI journal article supplement (doi:10.3390/cells12030415), 2008-01-01
Supplement: s1 [file s1]

## Supplementary Material

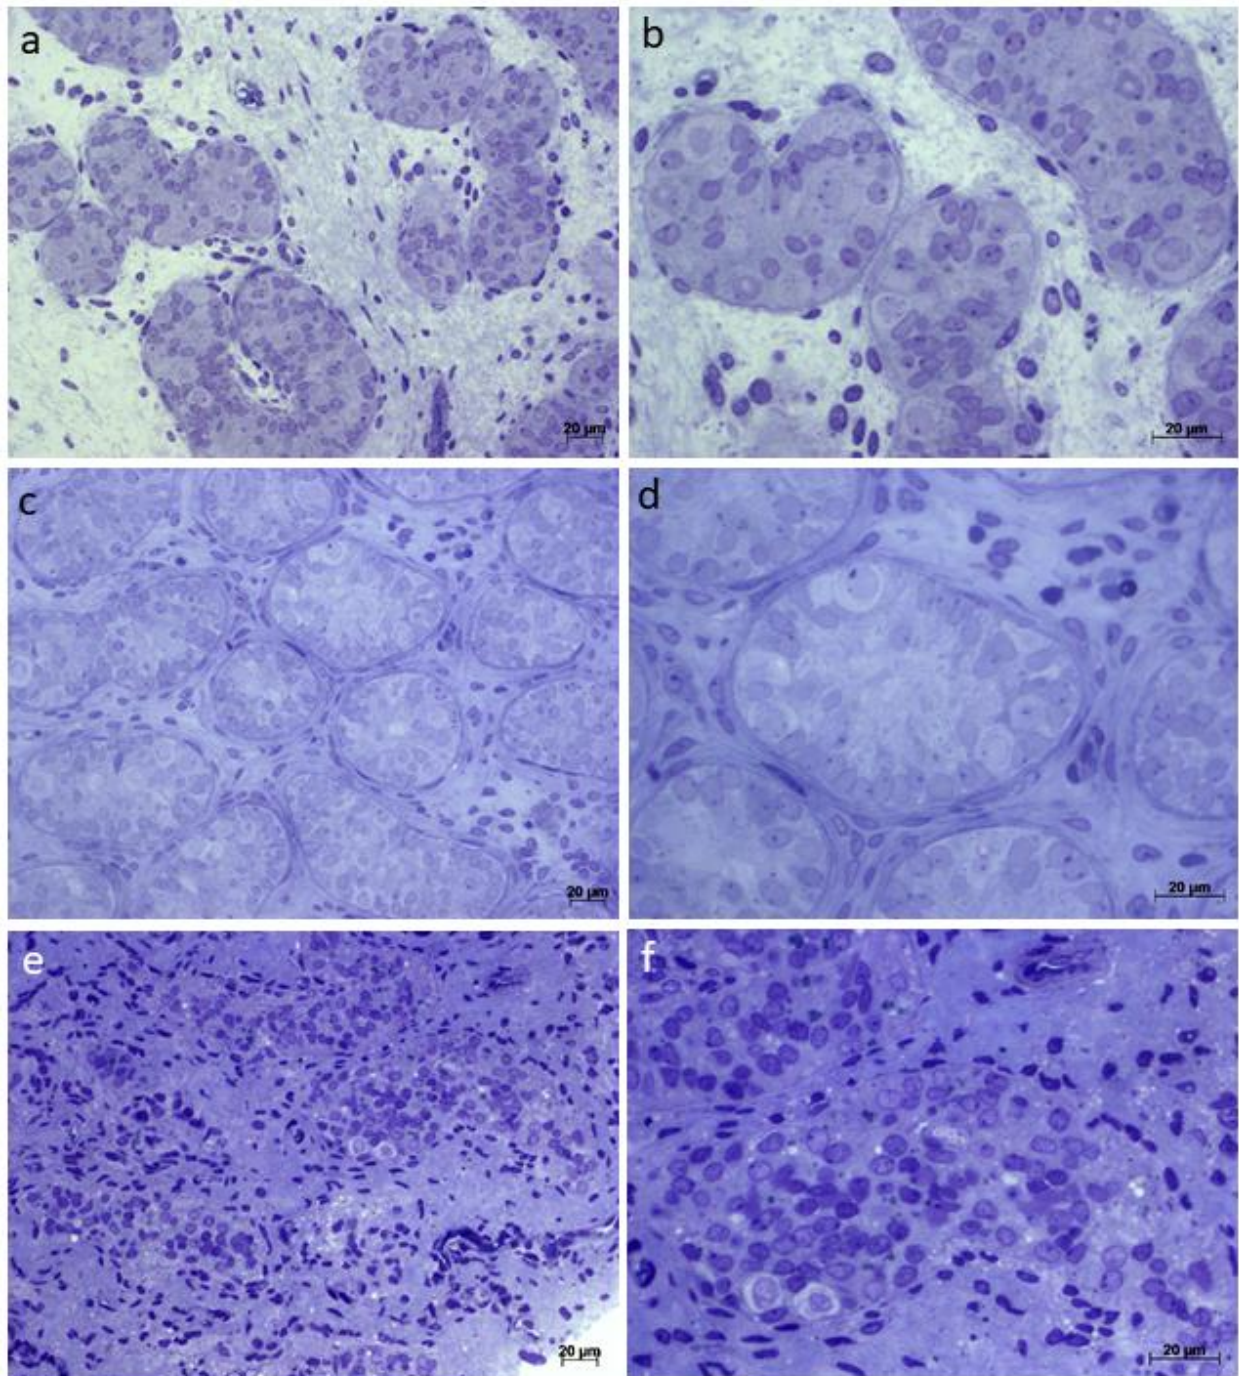

**Figure S1** Histology of the tissues used for organ culture in the native state, shown on semi-thin sections stained with toluidine blue and pyronine. (a, b) 7-year-old  $\beta$ -thalassemia major patient; (c, d) 12-year-old XIAP deficiency patient; (e, f) 9-year-old sickle cell disease patient.

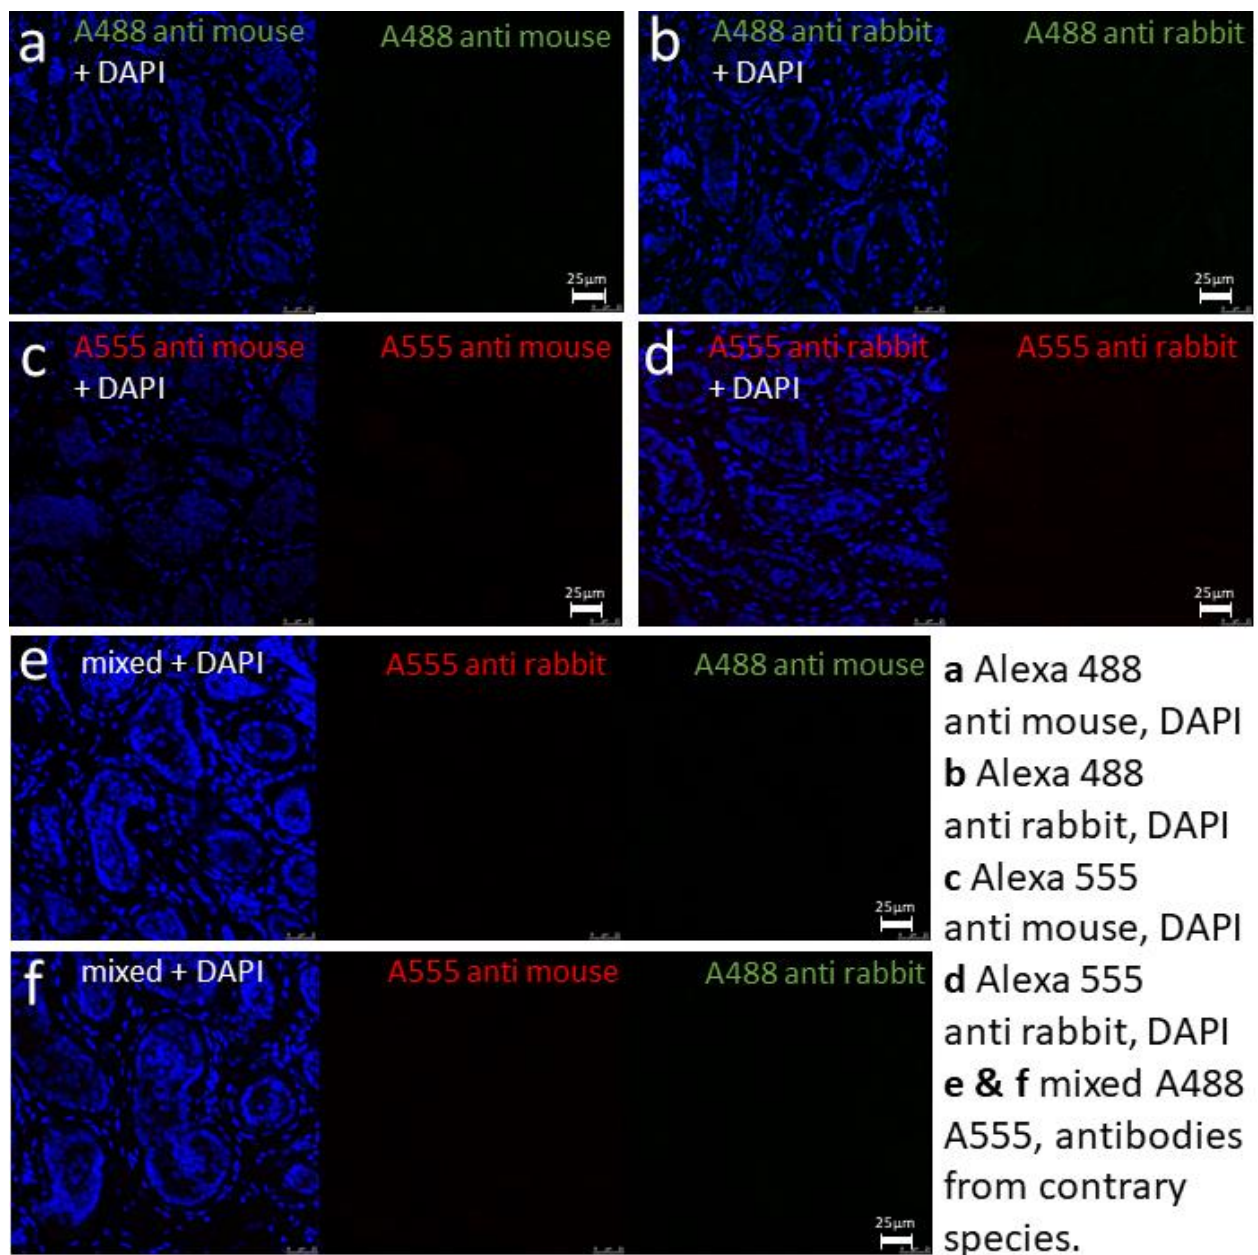

**Figure S2** Negative controls, prepubertal tissue.



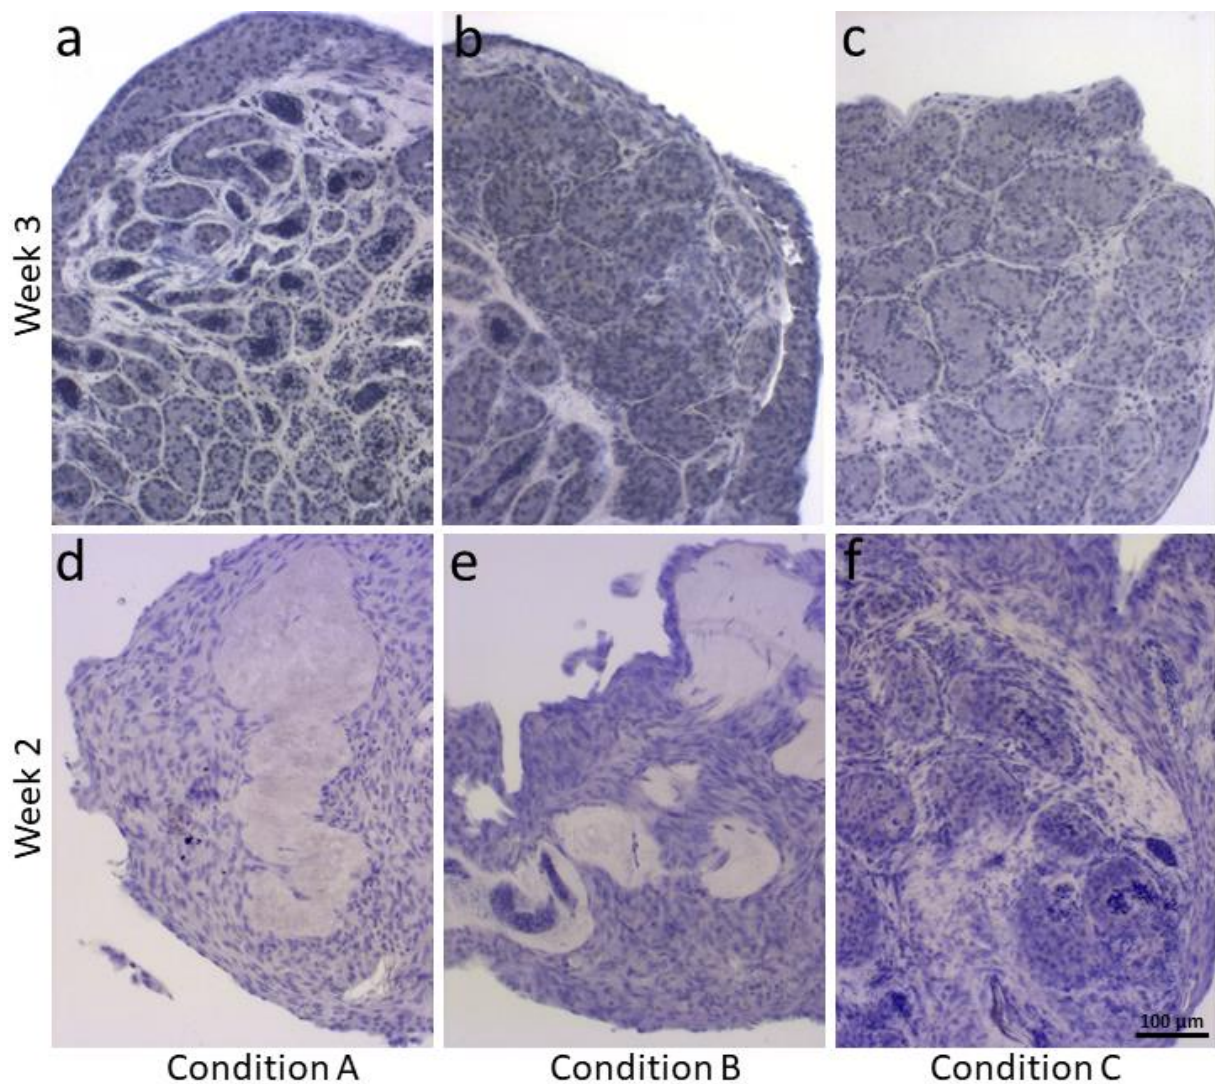

**Figure S3** Mayer's Hematoxylin staining of the tissue cultured under all 3 conditions. (a-c) 12-year-old with XIAP deficiency, week 3. (d-f) 9-year-old with sickle cell disease, insufficient tissue preservation with many fibrous areas, week 2.

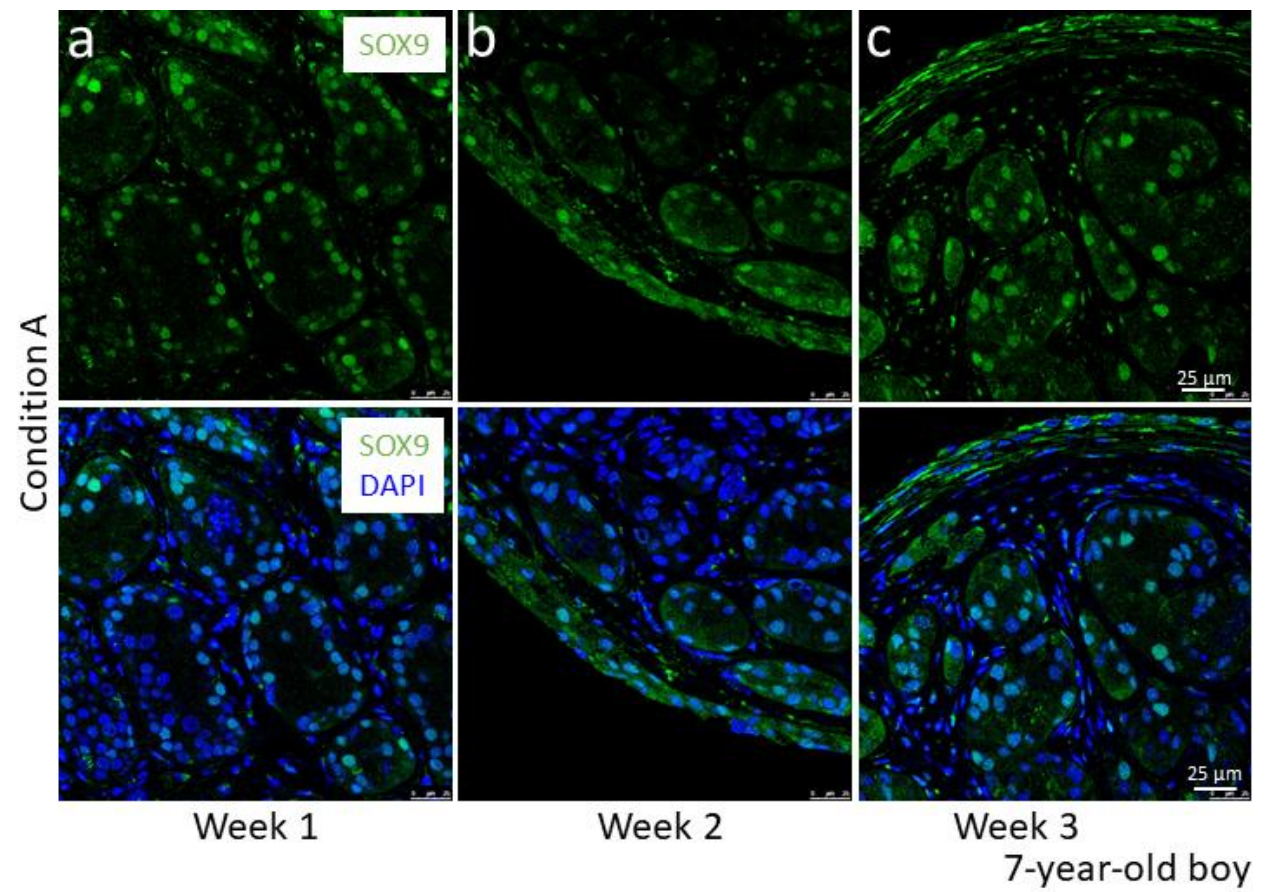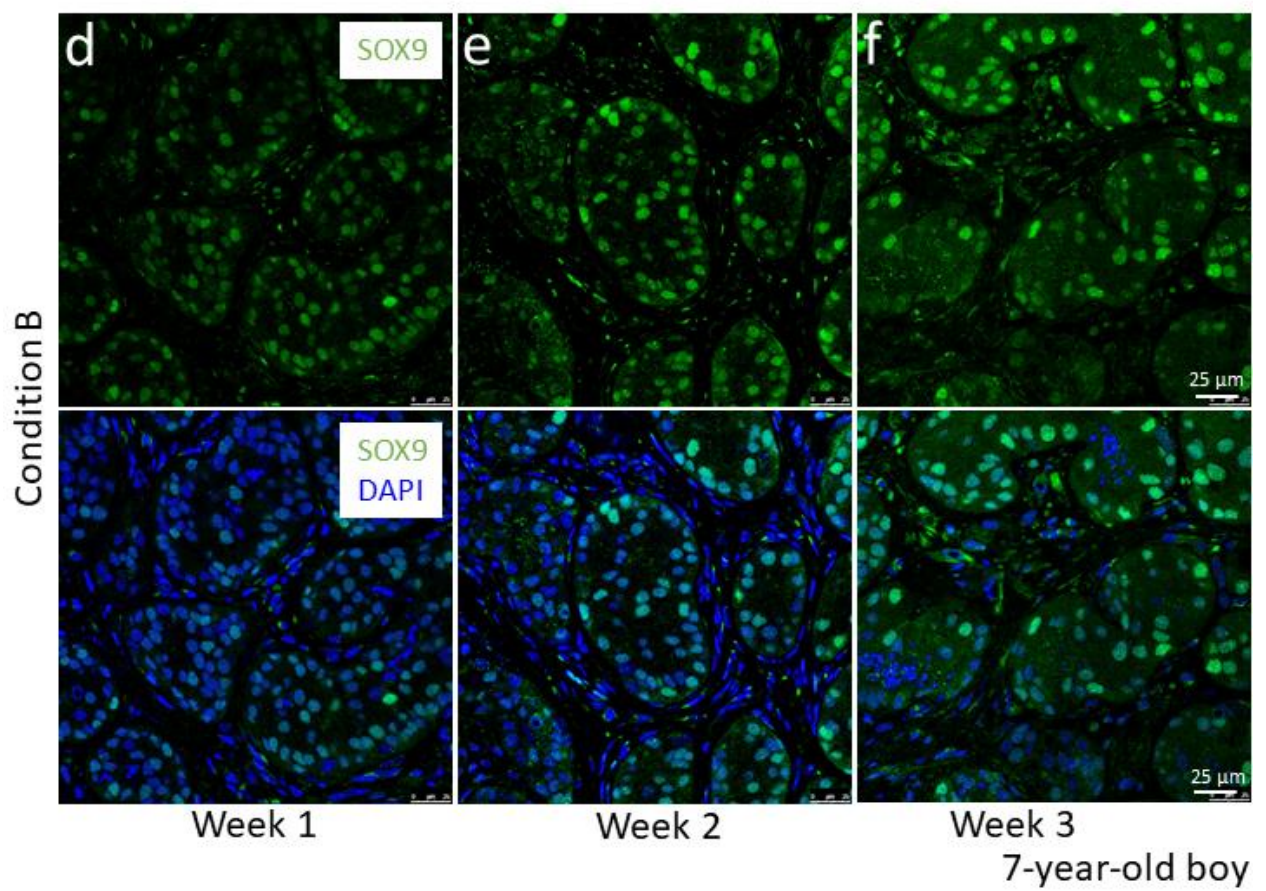

**Figure S4 (1/2)** SOX9 expression in Sertoli cell nuclei.



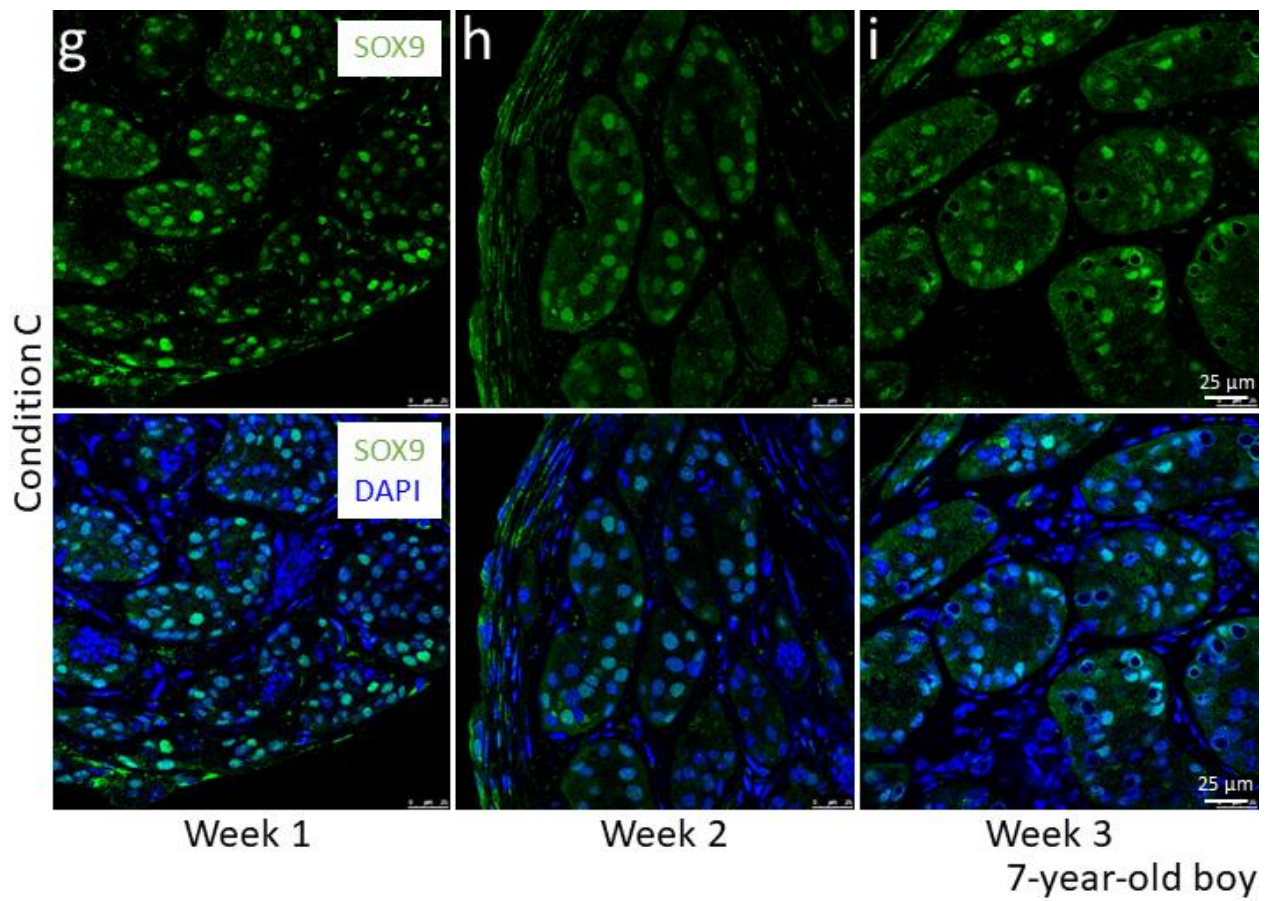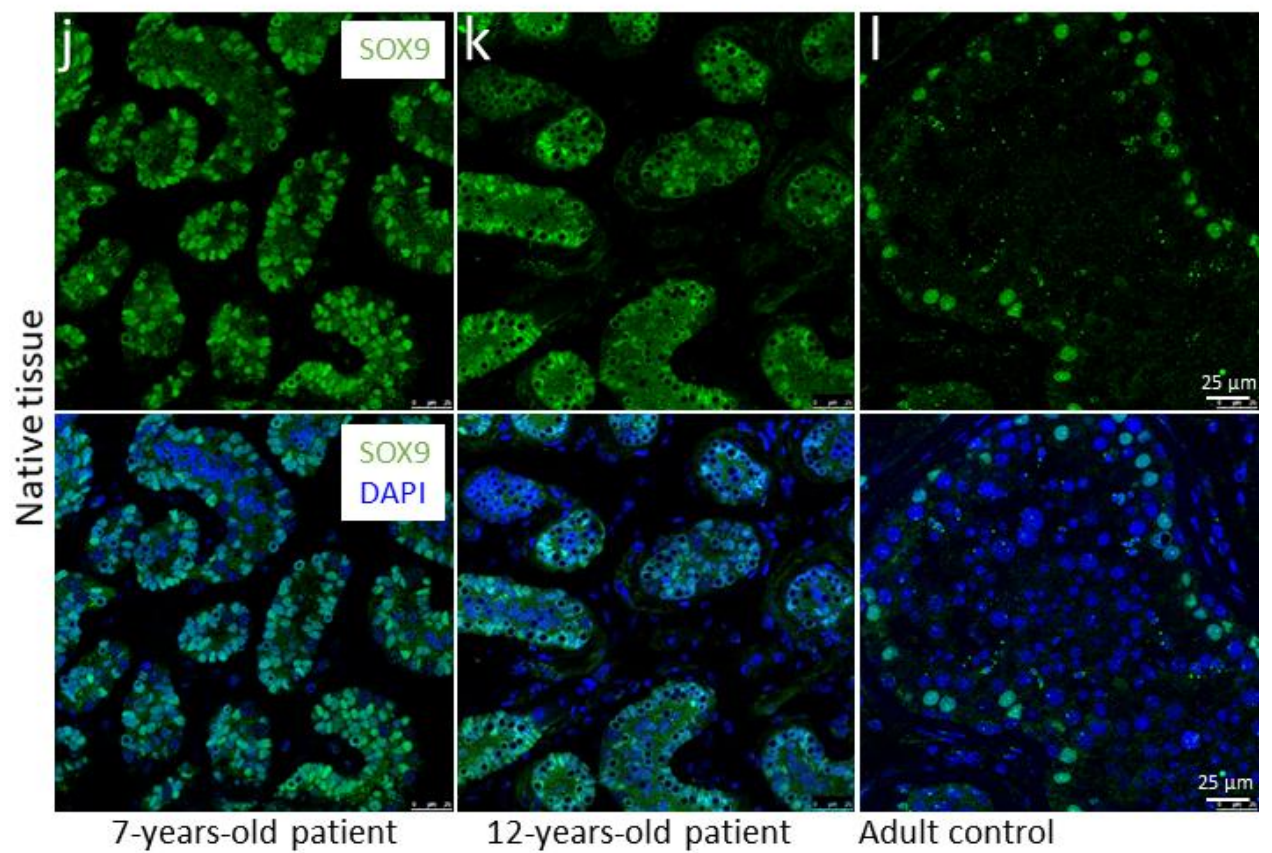

**Figure S4 (2/2)** SOX9 expression in Sertoli cell nuclei.



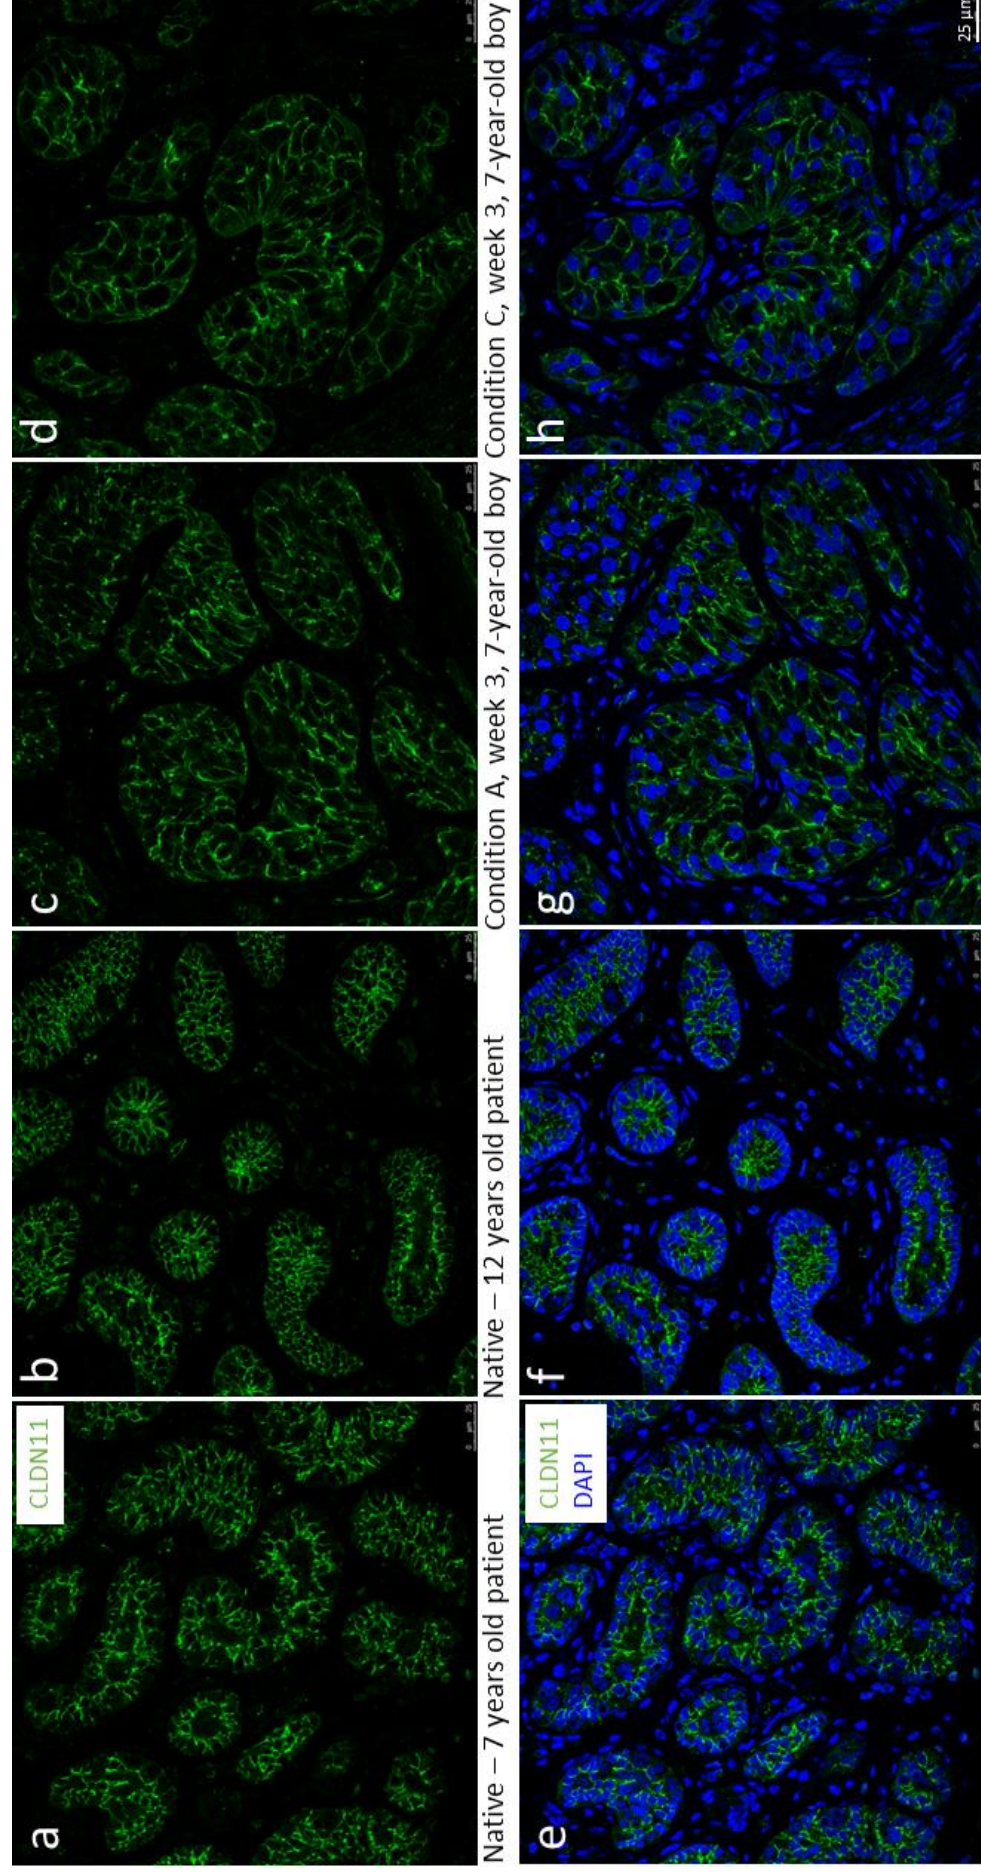

**Figure S5** Expression of the BTB component CLDN11 in Sertoli cells in the native prepubertal tissue and after 3 weeks of culture. For reasons of conciseness, Condition B, which showed a similar result, is not presented here.



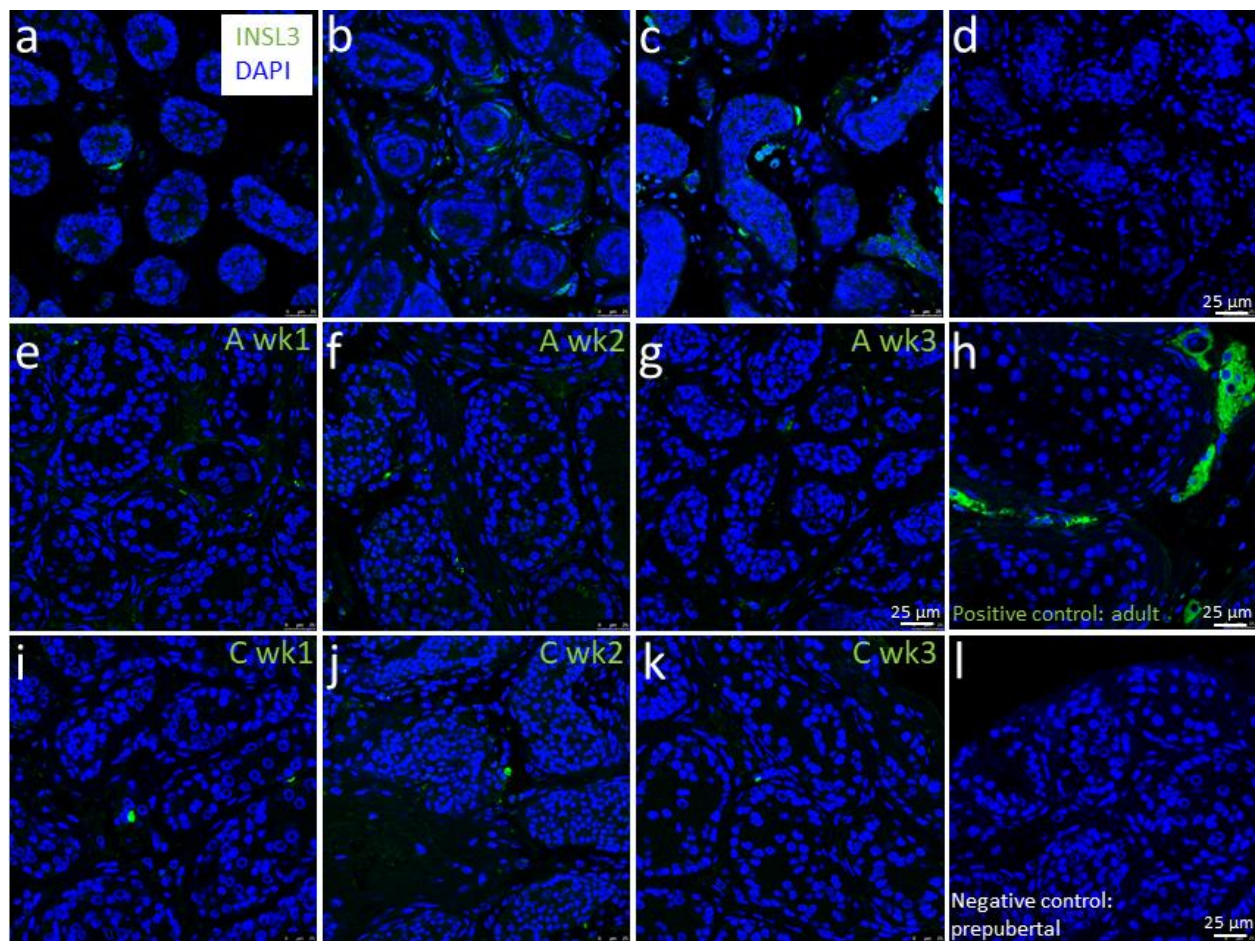

**Figure S6** INSL3 expression in the native and cultured prepubertal tissue and controls. (a-c) Native tissue of the 12-year-old patient, and (d) of the 7-year-old patient. (e, f, g, i, j, k) Cultured tissue of the 12-year-old patient. (h, l) Controls.

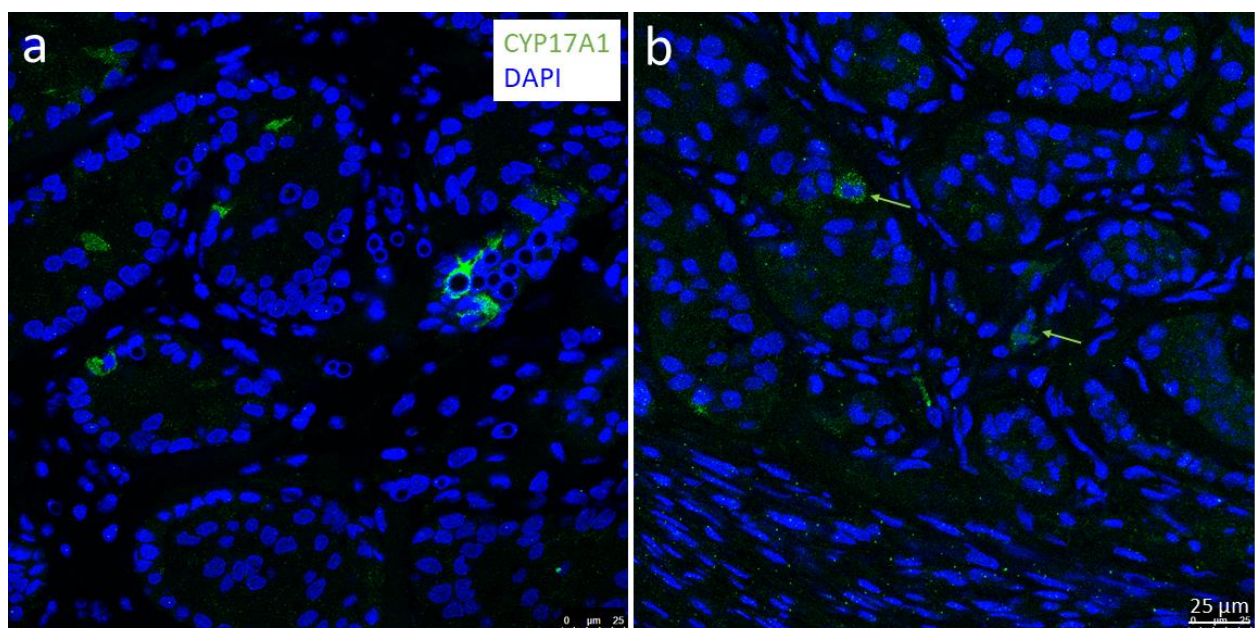

Condition C, week 3, 12-year-old patient      Condition C, week 3, 7-year-old patient  
**Figure S7** CYP17A1 expression in the cultured prepubertal tissue.



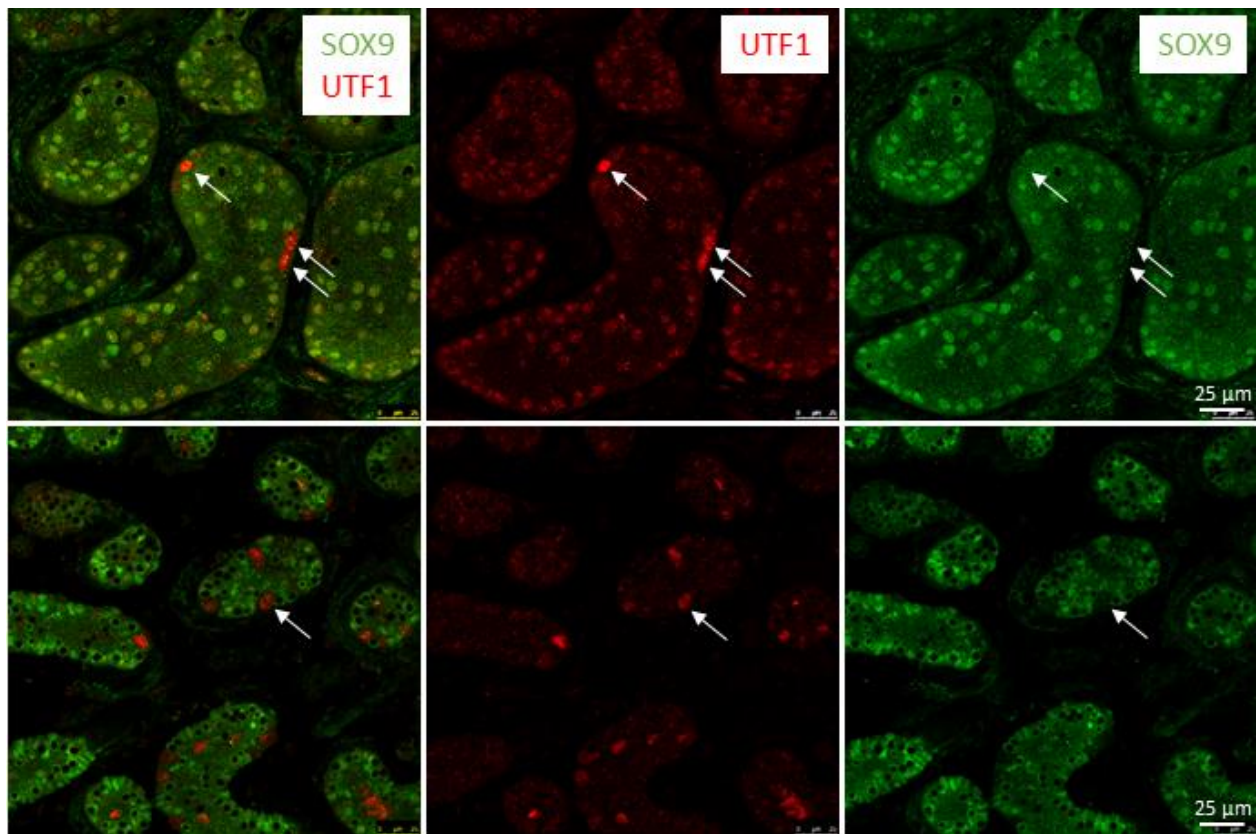

**Figure S8** Weak UTF1 expression in SOX9+ Sertoli cells in cultured tissue (upper row) vs. uncultured tissue (bottom row). UTF1+ spermatogonia marked by arrows.

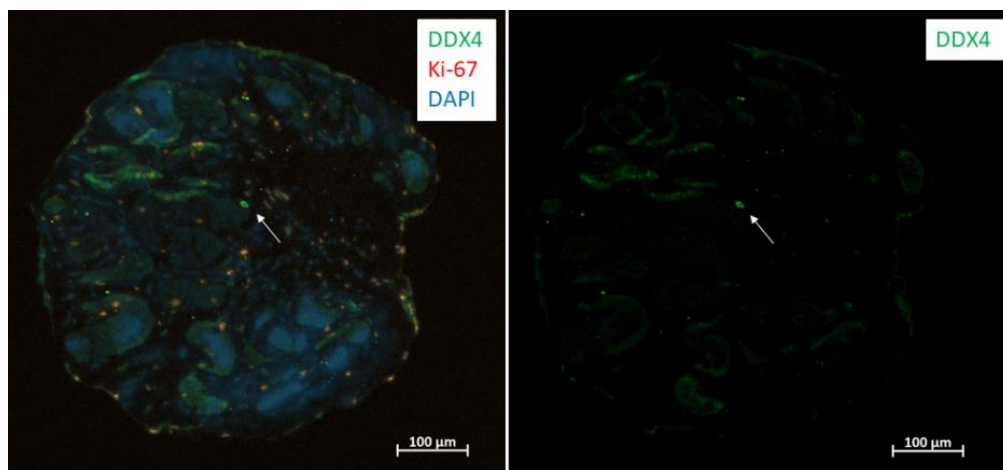

**Figure S9** DDX4/Ki-67 staining of cultured tissue from 9-year-old sickle cell disease patient, condition C, week 1.



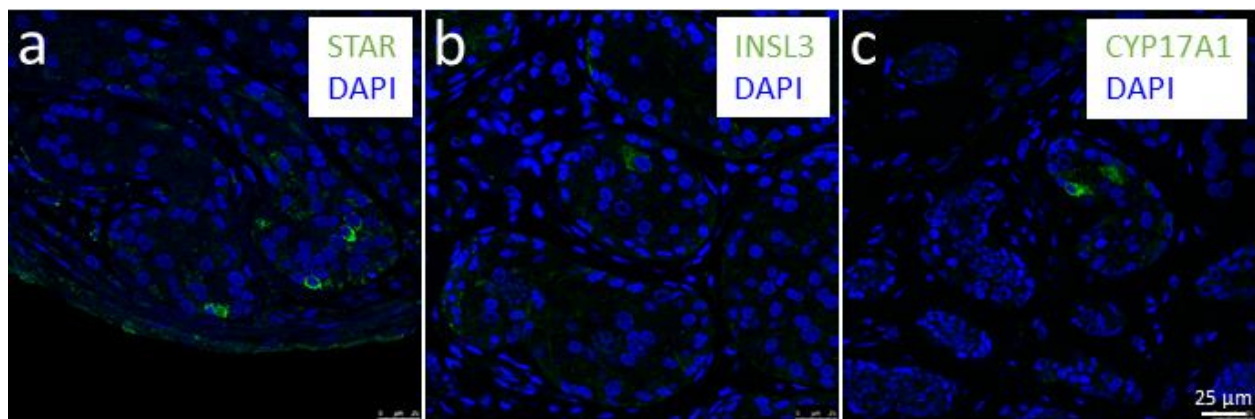

**Figure S10** Atypical staining of tubular cells from cultured tissue expressing (a) STAR, (b) INSL3, (c) CYP17A1.

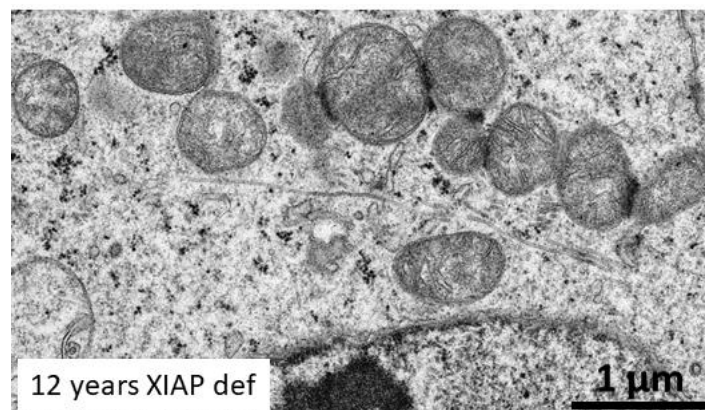

**Figure S11** Larger round mitochondria in undifferentiated SPG of the 12-year-old XIAP deficiency patient.

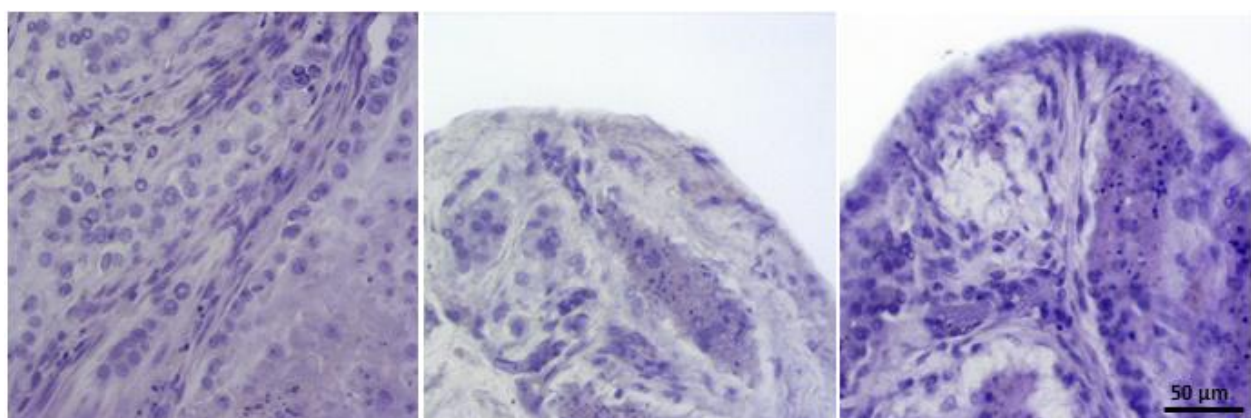

**Figure S12** Adult human testicular tissue cultivated for 2 weeks in different media.



Supplementary table S1: Primary antibody information

| <b>Antigen</b> | <b>Company</b>           | <b>Order number</b> | <b>Species</b> | <b>Clonality</b> | <b>Dilution</b> |
|----------------|--------------------------|---------------------|----------------|------------------|-----------------|
| <b>BOULE</b>   | Santa Cruz Biotechnology | sc-166660           | mouse          | monoclonal       | 1:100           |
| <b>CLDN11</b>  | Invitrogen               | 36-4500             | rabbit         | polyclonal       | 1:50            |
| <b>CYP17A1</b> | Santa Cruz Biotechnology | sc-374244           | mouse          | monoclonal       | 1:500           |
| <b>DDX4</b>    | Abcam                    | ab13840             | rabbit         | polyclonal       | 1:500           |
| <b>INSL3</b>   | Abcam                    | ab227974            | rabbit         | polyclonal       | 1:100           |
| <b>LAMA1</b>   | Abcam                    | ab210954            | mouse          | monoclonal       | 1:20            |
| <b>MKI67</b>   | Agilent Technologies     | M7240               | mouse          | monoclonal       | 1:50            |
| <b>PIWIL4</b>  | Sigma-Aldrich            | HPA036588           | rabbit         | polyclonal       | 1:100           |
| <b>SMA</b>     | Sigma-Aldrich            | A2547               | mouse          | monoclonal       | 1:500           |
| <b>SOX9</b>    | EMD Millipore            | AB5535              | rabbit         | polyclonal       | 1:100           |
| <b>STAR</b>    | Sigma-Aldrich            | HPA023644           | rabbit         | polyclonal       | 1:100           |
| <b>UTF1</b>    | EMD Millipore            | MAB4337             | mouse          | monoclonal       | 1:50            |

Supplementary table S2: Secondary antibody information

| <b>Secondary antibody name</b>       | <b>Company</b>    | <b>Order number</b> | <b>Dilution</b> |
|--------------------------------------|-------------------|---------------------|-----------------|
| Alexa Fluor 488 goat anti-mouse IgG  | Invitrogen        | A11001              | 1:200           |
| Alexa Fluor 488 goat anti-rabbit IgG | Invitrogen        | A11034              | 1:200           |
| Alexa Fluor 555 goat anti-mouse IgG  | Life technologies | A21422              | 1:80            |
| Alexa Fluor 555 goat anti-rabbit IgG | Life technologies | A21429              | 1:80            |



Supplementary table 3: Organ/organotypic culture using human prepubertal testis tissues (2017-2022)

|                                             | De Michele et al. 2017                                 | De Michele et al. 2018                                                                                                   | Medrano et al. 2018                                                                                                                                                                      | Portela et al. 2019                                 | Kurek et al. 2021                                                                                  | Wang et al. 2022                                                                                                                           | Aden et al. 2023                                                                                        |
|---------------------------------------------|--------------------------------------------------------|--------------------------------------------------------------------------------------------------------------------------|------------------------------------------------------------------------------------------------------------------------------------------------------------------------------------------|-----------------------------------------------------|----------------------------------------------------------------------------------------------------|--------------------------------------------------------------------------------------------------------------------------------------------|---------------------------------------------------------------------------------------------------------|
| N (experiment)                              | 3                                                      | 5                                                                                                                        | 4                                                                                                                                                                                        | 9                                                   | 16                                                                                                 | 4                                                                                                                                          | 3 (2)                                                                                                   |
| Donor tissue                                | 2-12 y/o                                               | 2-12 y/o                                                                                                                 | 7-14 y/o                                                                                                                                                                                 | 6-14 y/o                                            | 1.6-13.4 y/o                                                                                       | 0.5-1.4 y/o                                                                                                                                | 7-12 y/o                                                                                                |
| Experiment length                           | 139d                                                   | 139d                                                                                                                     | 70d                                                                                                                                                                                      | 35d                                                 | 14d                                                                                                | 60d                                                                                                                                        | 21d                                                                                                     |
| Germ cell markers                           | MAGEA4 <sup>1</sup>                                    | MAGEA4 <sup>1</sup> , SYCP3 <sup>1</sup> , BOULE <sup>1</sup> , ACE <sup>1</sup> , PRM2 <sup>1</sup> , TNP1 <sup>1</sup> | PLZF <sup>2</sup> , FGFR3 <sup>2</sup> , UTF1 <sup>1,2</sup> , SALL4 <sup>2</sup> , c-KIT <sup>1</sup> , DDX4 <sup>1</sup> , DAZL <sup>2</sup> , SYCP3 <sup>1,2</sup> , ACR <sup>2</sup> | MAGEA4 <sup>1</sup>                                 | DDX4 <sup>1</sup> , MAGEA4 <sup>1</sup> , POU5F1 <sup>1</sup>                                      | ACR <sup>1</sup> , BOULE <sup>1</sup> , CREM <sup>1</sup> , DDX4 <sup>1</sup> , GAGE <sup>1</sup> , MAGEA <sup>1</sup> , PRM1 <sup>1</sup> | BOULE <sup>1</sup> , DDX4 <sup>1</sup> , PIWIL4 <sup>1</sup>                                            |
| SPG count after culture                     | ↓                                                      | ↓                                                                                                                        | ↓                                                                                                                                                                                        | ↓                                                   | ↓                                                                                                  | ↓                                                                                                                                          | ↓                                                                                                       |
| Most advanced germ cell type during culture | not examined                                           | SYCP3+ SPCs, BOULE+ SPCs/ rSPT, rare ACE+ eSPT                                                                           | SYCP3+ cells                                                                                                                                                                             | SPG                                                 | not examined                                                                                       | BOULE+ SPCs                                                                                                                                | SPG                                                                                                     |
| SPG proliferation markers                   | MAGEA4/Ki-67 <sup>1</sup>                              | MAGEA4/Ki-67 <sup>1</sup>                                                                                                | not examined                                                                                                                                                                             | MAGEA4/PCNA <sup>1</sup>                            | only Ki-67 <sup>1</sup>                                                                            | Morphology, Ki-67 <sup>1</sup>                                                                                                             | DDX4/Ki-67 <sup>1</sup> , PIWIL4/Ki-67 <sup>1</sup>                                                     |
| Proliferative SPG during culture            | proliferating SPG↓, ratio* ↑ (maintained until d64)    | proliferating SPG↓, ratio* ↑ (maintained until d139)                                                                     | not examined                                                                                                                                                                             | ↓                                                   | Ki-67↑                                                                                             | Ki-67↑                                                                                                                                     | proliferation maintained                                                                                |
| Markers used for SC detection               | AMH <sup>1</sup> , AR <sup>1</sup> , GDNF <sup>1</sup> | AMH <sup>1</sup> , AR <sup>1</sup> , GDNF <sup>1</sup> , SOX9 <sup>1</sup>                                               | AMH <sup>1</sup> , AR <sup>1</sup> , SOX9 <sup>1,2</sup> , ZO1 <sup>1</sup>                                                                                                              | AMH <sup>1</sup> , AR <sup>1</sup>                  | -                                                                                                  | AMH <sup>1</sup> , AR <sup>1</sup> , SOX9 <sup>1</sup> , ZO1 <sup>1</sup>                                                                  | ultrastructure <sup>3</sup> , SOX9 <sup>1</sup> , CLDN11 <sup>1</sup>                                   |
| SCs during culture                          | AMH ↓, GDNF, AR constant, AMH secretion↓               | AMH ↓ (ns), SOX9, AR, GDNF constant, AMH secretion↓                                                                      | SOX9↓, AMH↓, SOX9/AR↓, ZO1 unorganized, AMH secretion↓                                                                                                                                   | AMH ↓, AR not expressed                             | not examined                                                                                       | SOX9↑, AMH ↓, AR induced                                                                                                                   | SOX9, CLDN11 maintained                                                                                 |
| LC markers                                  | 3β-HSD <sup>1</sup>                                    | STAR <sup>1</sup>                                                                                                        | STAR <sup>2</sup>                                                                                                                                                                        | -                                                   | -                                                                                                  | CYP17A1 <sup>1</sup> , STAR <sup>1</sup>                                                                                                   | Morphology, ultrastructure <sup>3</sup> , CYP17A1 <sup>1</sup> , INSL3 <sup>1</sup> , STAR <sup>1</sup> |
| LCs during culture                          | no significant changes, testosterone secretion         | STAR↑, testosterone secretion                                                                                            | STAR↑ in one condition after 14 days, testosterone secretion                                                                                                                             | histologically not examined, testosterone secretion | not examined                                                                                       | STAR induced, CYP17A1 maintained                                                                                                           | CYP17A1↑, STAR present, INSL3 partially present, steroid hormones secreted                              |
| PTC markers                                 | -                                                      | -                                                                                                                        | SMA <sup>2</sup>                                                                                                                                                                         | -                                                   | LAMA1 <sup>1</sup> , LAMA5 <sup>1</sup> ; type IV collagen <sup>1</sup> , fibronectin <sup>1</sup> | SMA <sup>1</sup>                                                                                                                           | SMA <sup>1</sup> , LAMA1 <sup>1</sup>                                                                   |
| PTCs during culture                         | not examined                                           | not examined                                                                                                             | SMA↑                                                                                                                                                                                     | not examined                                        | LAMA1↓ and weak seminiferous LAMA 5 expression in some samples                                     | induction of SMA in peritubular walls                                                                                                      | SMA↑                                                                                                    |
| Supernatant analysis                        | testosterone, AMH, LDH                                 | testosterone, AMH                                                                                                        | testosterone, AMH                                                                                                                                                                        | testosterone                                        | no                                                                                                 | no                                                                                                                                         | progesterone, 17-OHP, androstenedione, testosterone, estradiol via LCMS/MS                              |
|                                             | 1 IHC                                                  | 2 PCR                                                                                                                    | 3 TEM                                                                                                                                                                                    | *ratio = proliferating SPG/total number of SPG      |                                                                                                    |                                                                                                                                            |                                                                                                         |

**Abbreviations:** **17-OHP**, 17α-hydroxyprogesterone; **3β-HSD**, 3β-hydroxysteroid dehydrogenase; **ACE**, angiotensin I converting enzyme; **ACR**, acrosin; **AMH**, anti-muellerian hormone; **AR**, androgen receptor; **BOULE (BOLL)**, boule-like RNA binding protein; **CLDN11**, claudin 11; **c-KIT (KIT)**, KIT proto-oncogene, receptor tyrosine kinase; **CREM**, CAMP-responsive element modulator; **CYP17A1**, cytochrome P450 family 17 subfamily A member 1; **DAZL**, deleted in azoospermia-like; **DDX4**, DEAD-box helicase 4; **FGFR3**, fibroblast growth factor receptor 3; **GAGE**, G antigen; **GDNF**, glial cell derived neurotrophic factor; **IHC**, immunohistochemistry; **INSL3**, insulin like 3; **Ki-67**, marker of proliferation Ki-67; **LAMA1**, laminin subunit alpha-1; **LAMA5**, laminin subunit alpha-5; **MAGEA**, melanoma-associated antigen A (family); **MAGEA4**, melanoma-associated antigen 4; **PCNA**, proliferating cell nuclear antigen; **PCR**, polymerase chain reaction; **PIWIL4**, piwi like RNA-mediated gene silencing 4; **PLZF (ZBTB16)**, zinc finger and BTB domain-containing protein 16; **POU5F1**, POU class 5 homeobox 1; **PRM1**, protamine 1; **PRM2**, protamine 2; **SALL4**, spalt like transcription factor 4; **SMA (ACTA2)**, actin alpha 2, smooth muscle; **SOX9**, SRY-box transcription factor 9; **SPCs**, spermatocytes; **SPG**, spermatogonia; **eSPTs**, elongated spermatids; **rSPTs**, round spermatids; **STAR**, steroidogenic acute regulatory protein; **SYCP3**, synaptonemal complex protein 3; **TEM**, transmission electron microscopy; **TNP1**, transition protein 1; **UTF1**, undifferentiated embryonic cell transcription factor 1; **ZO1 (TJP1)**, tight junction protein 1
